# Supplementary material for: Phosphorylation of threonine 154 in p40phox is an important physiological signal for activation of the neutrophil NADPH oxidase
Source: PubMed Central journal article supplement — Blood. 2010 Sep 22;116(26):6027–36. doi: 10.1182/blood-2010-08-300889 (PMC3031388; doi:10.1182/blood-2010-08-300889), 2010-12-23

**Figure S1. p40<sup>phox+/-</sup> neutrophils display normal levels of ROS production.**

(A) Lysates from  $4 \times 10^5$  wt (+/+), p40<sup>phox+/-</sup>(+/-) or p40<sup>phox-/-</sup>(-/-) BMN were subjected to SDS-PAGE and immunoblotted for p40<sup>phox</sup>, p67<sup>phox</sup> and p47<sup>phox</sup> as described in Materials and Methods. A representative experiment of three is shown. (B)  $1 \times 10^6$  wt, p40<sup>phox+/-</sup> or p40<sup>phox-/-</sup> BMN were pre-incubated with luminol/HRP prior to addition to fMLP or PMA, or pre-incubated with luminol prior to addition to serum-*S.aureus* or IgG-SRBC, as described in Materials and Methods. Histograms represent total integrated ROS responses as a percentage of wt. All data are means  $\pm$  SEM (n=3; performed in duplicate).

**Figure S2. Acidic substitution of T154 does not increase activity of the NADPH oxidase.**

(A) p40<sup>phox-/-</sup> BMN reconstituted with ev, wt p40<sup>phox</sup> or p40<sup>phox</sup>-T154E were sonicated, subjected to SDS-PAGE and immunoblotted for *phox* components as described in Materials and Methods. A representative blot of three is shown. (B) Protein expression was quantified with Aida software, as described in Materials and Methods. Levels of p40<sup>phox</sup> and p67<sup>phox</sup> were normalised against levels of p47<sup>phox</sup>, which was used as a loading control. Histograms represent relative levels of p40<sup>phox</sup> (left) or p67<sup>phox</sup> (right) as a percentage of wt. Data are means  $\pm$  SEM (n=3 independent experiments performed in duplicate). (C-F) ROS production was measured in p40<sup>phox-/-</sup> BMN reconstituted as indicated, as described in Figure 3B-E. Histograms represent total integrated ROS responses as a percentage of wt. All data are means  $\pm$  SEM (n=3; performed in duplicate). Where indicated, differences between means of

wt and mutated p40<sup>phox</sup> are statistically significant. \*p=0.02; \*\*p=0.004; as determined by a paired Student's *t*-test.

**Figure S3. Structure of the SH3 domain of p40<sup>phox</sup> in complex with the PP motif of p47<sup>phox</sup>**

Left: wt p40<sup>phox</sup>. The position of W207 in the SH3 domain of p40<sup>phox</sup> is indicated, as well as the position of R368 (blue) in the PP motif of p47<sup>phox</sup>. Right: mutated p40<sup>phox</sup> containing the W207Y substitution, which introduced an acidic hydroxyl group (indicated by the green arrow). Figure created with Deep View software. PDB code: 1W70.

**Figure S4. T154A substitution on a p40<sup>phox</sup>-ΔSH3 background does not increase activity of the NADPH oxidase.**

(A) p40<sup>phox</sup><sup>-/-</sup> BMN reconstituted with ev, wt p40<sup>phox</sup> or p40<sup>phox</sup>-ΔSH3/T154A were sonicated, subjected to SDS-PAGE and immunoblotted for *phox* components as described in Materials and Methods. A representative blot of three is shown. (B) Protein expression was quantified with Aida software, as described in Materials and Methods. Levels of p40<sup>phox</sup> and p67<sup>phox</sup> were normalised against levels of p47<sup>phox</sup>, which was used as a loading control. Histograms represent relative levels of p40<sup>phox</sup> (left) or p67<sup>phox</sup> (right) as a percentage of wt. Data are means ± SEM (n=3 independent experiments performed in duplicate). (C-F) ROS production was measured in p40<sup>phox</sup><sup>-/-</sup> BMN reconstituted as indicated, as described in Figure 3B-E. Histograms represent total integrated ROS responses as a percentage of wt. All data are means ± SEM (n=3; performed in duplicate). Where indicated, differences between means of

wt and mutated p40<sup>phox</sup> are statistically significant. \*p=0.002; \*\*p=0.001; \*\*\*p=0.000; as determined by a paired Student's *t*-test.

**Figure S5. Effect of PKC inhibitors, genetic ablation of PKC $\delta$  or wortmannin on ROS production.**

(A)  $1 \times 10^6$  BMN from wt C57BL/6J mice were pre-treated for 10 minutes with vehicle control (0.1% DMSO), BIM-1, Gö 6976 or Gö 6983 at a concentration of 1  $\mu$ M, or with wortmannin at a concentration of 100 nM or 300 nM. Cells were then used in chemiluminescence assays for ROS production as described in Figure S1B. Histograms represent total integrated ROS responses as a percentage of vehicle control. All data are means  $\pm$  SEM (n=3; performed in duplicate), with the exception of *S.aureus* + wortmannin or IgG-SRBC + wortmannin, where n=1 due to previous published and unpublished observations (<sup>1</sup> and S. Kulkarni, personal communication). (B)  $1 \times 10^6$  wt or PKC $\delta$ <sup>-/-</sup> BMN were used in chemiluminescence assays for ROS production as described in Figure S1B. Histograms represent total integrated ROS responses as a percentage of wt. Data are means  $\pm$  SEM (n=3; performed in duplicate).

**Figure S6. p40<sup>phox</sup><sup>-/-</sup> neutrophils display a large defect in translocation of p47<sup>phox</sup> to *S.aureus* phagosomes.**

$5 \times 10^4$  wt or p40<sup>phox</sup><sup>-/-</sup> BMN were incubated without or with  $1 \times 10^6$  serum-opsonised *S.aureus* for 7 min at 37°C. Samples were processed and visualised as described in Figure 7. Shown are representative fluorescence and DIC images for conditions tested. Arrows indicate the position of internalised bacteria. Cytosolic and phagosomal accumulation of *phox* components was quantified for at least 50 phagocytic events under each condition using LSM

510 Image browser software. Data are presented as increase in fluorescence intensity over cytosolic levels (% of wt; mean  $\pm$  SEM). \*\*Difference between means of wt and p40<sup>phox-/-</sup> neutrophils is statistically significant.  $p < 0.001$  as determined by a paired Student's *t*-test.

## REFERENCES

1. Ellson C, Davidson K, Anderson K, Stephens LR, Hawkins PT. PtdIns3P binding to the PX domain of p40phox is a physiological signal in NADPH oxidase activation. *Embo J.* 2006;25(19):4468-4478.

# Figure S1

## A

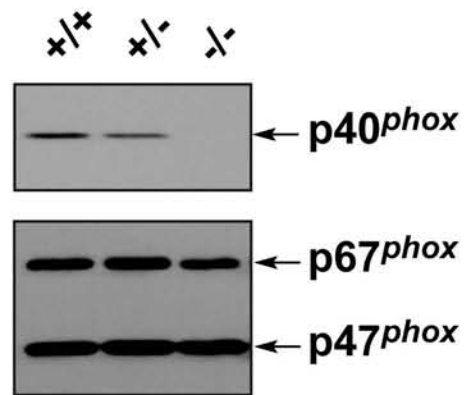

## B

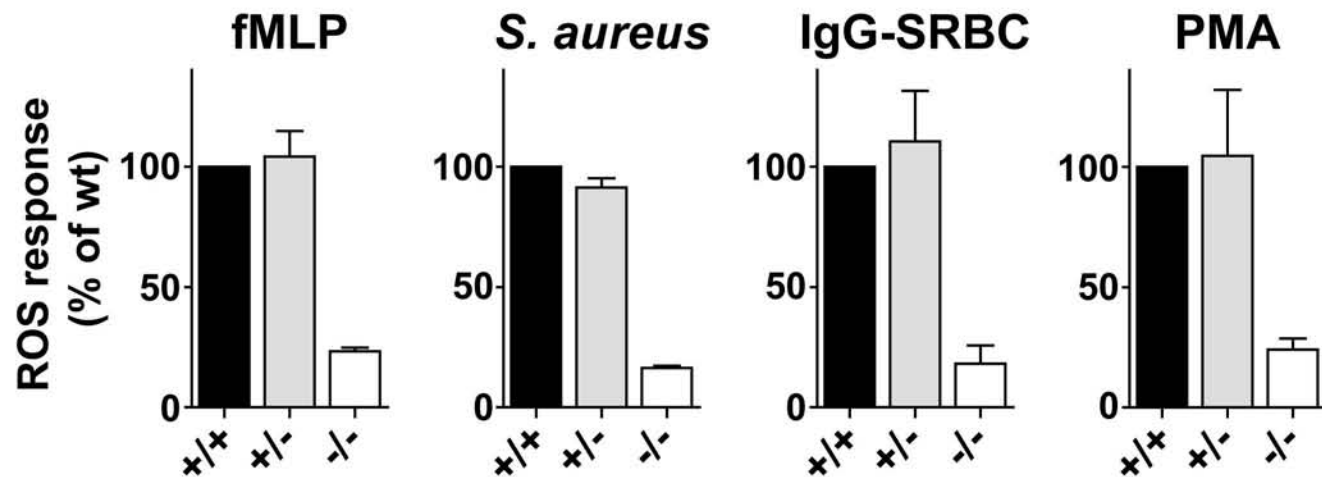

# Figure S2

## A

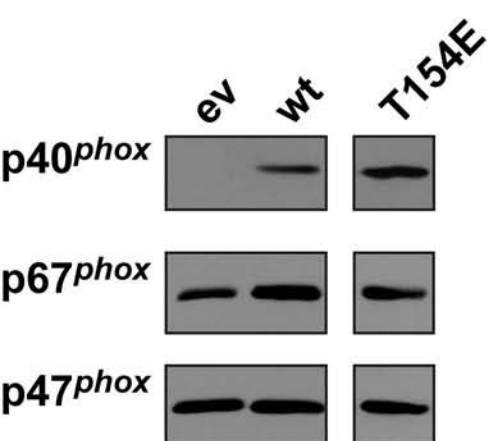

## B

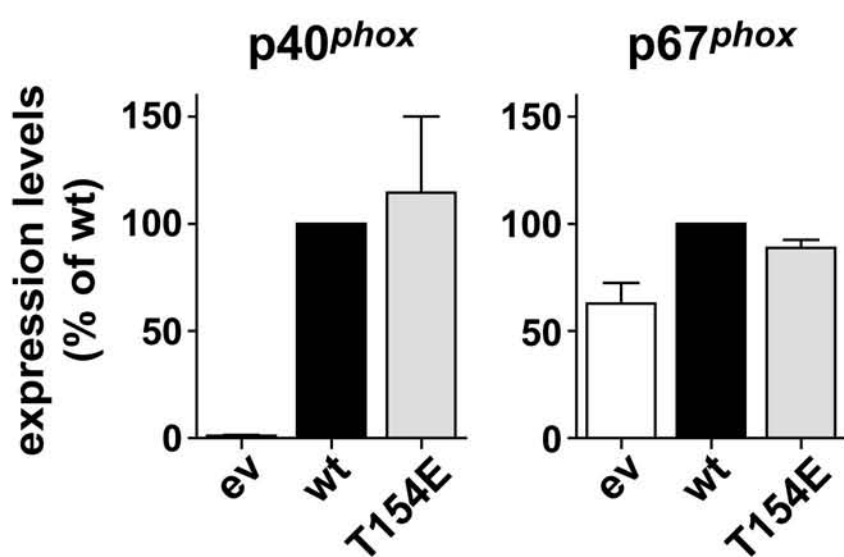

## C

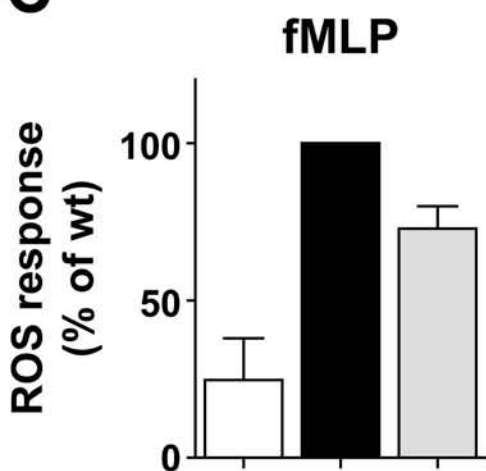

## D

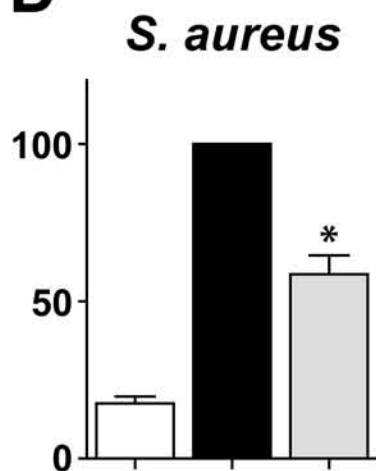

## E

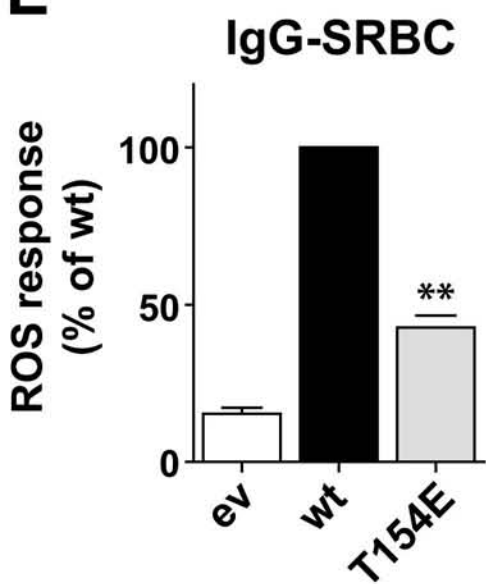

## F

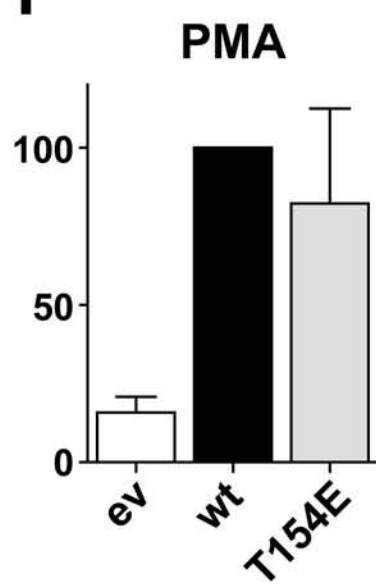

**Figure S3**

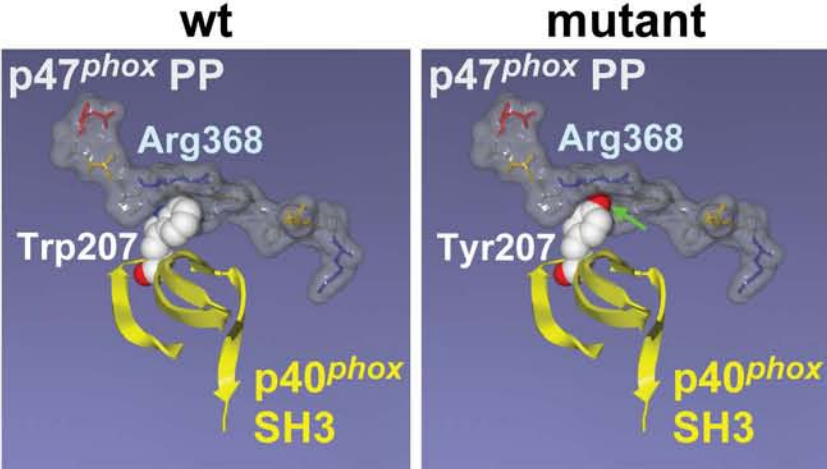

# Figure S4

## A

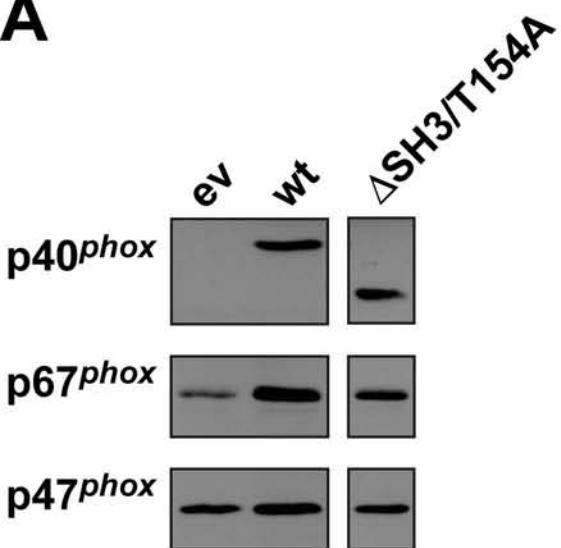

## B

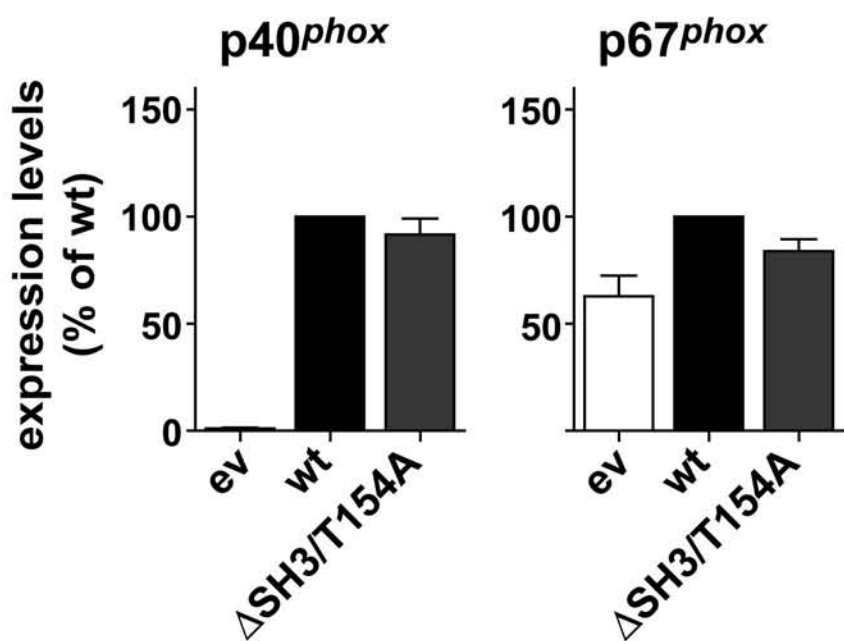

## C

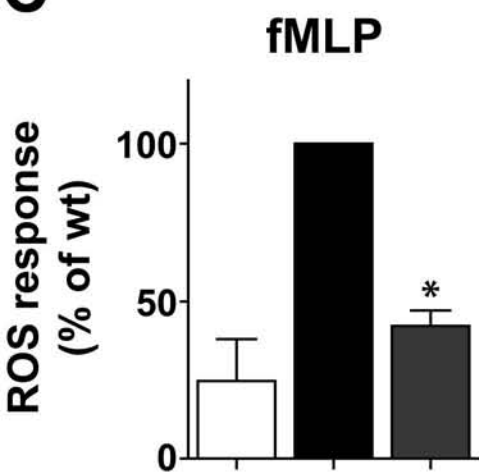

## D

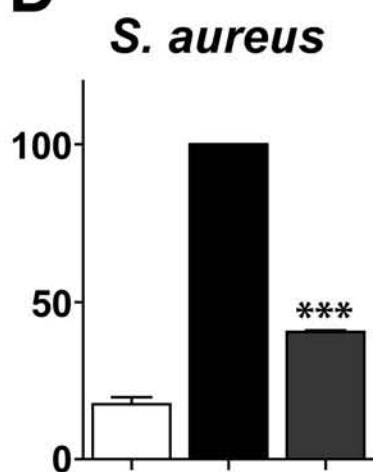

## E

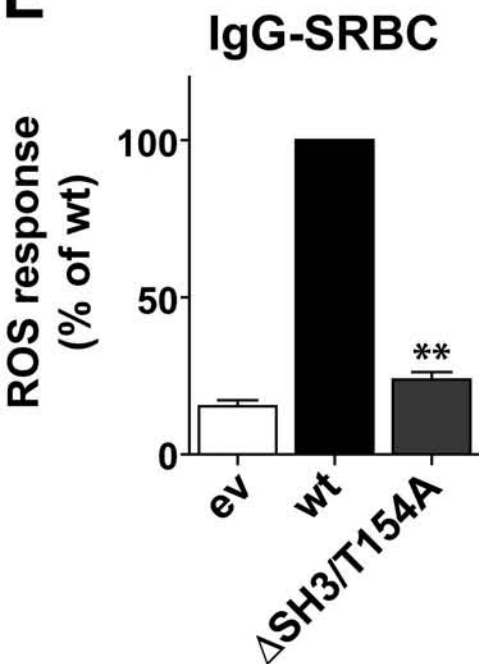

## F

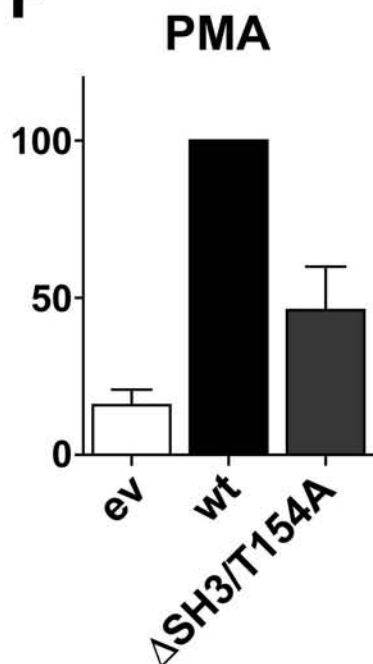



**Figure S5****A**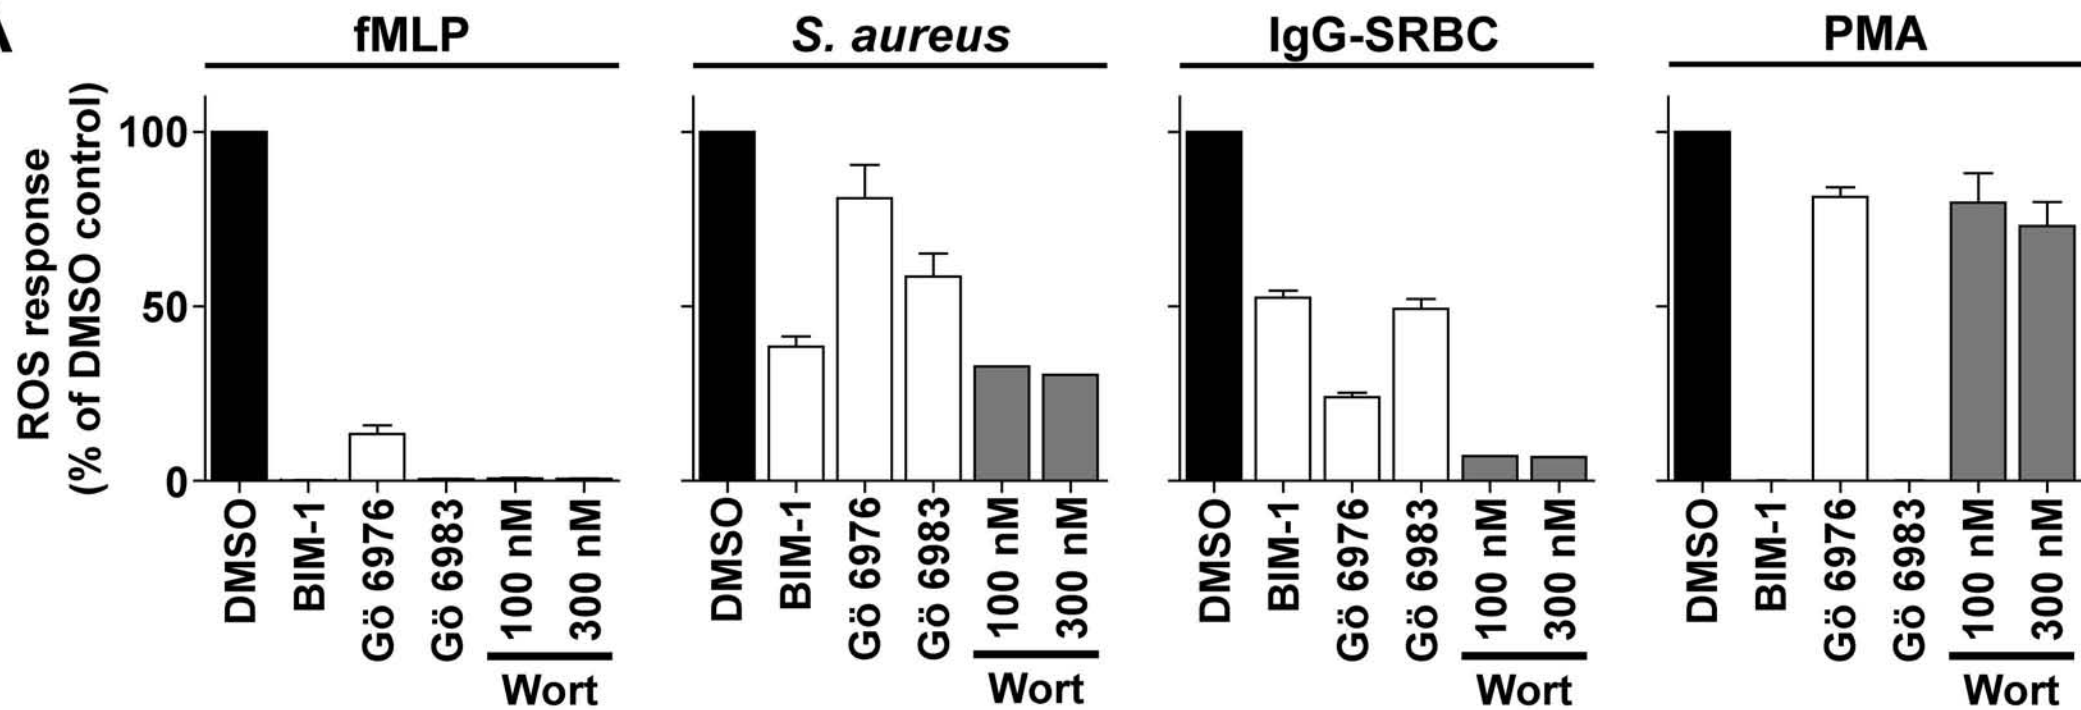**B**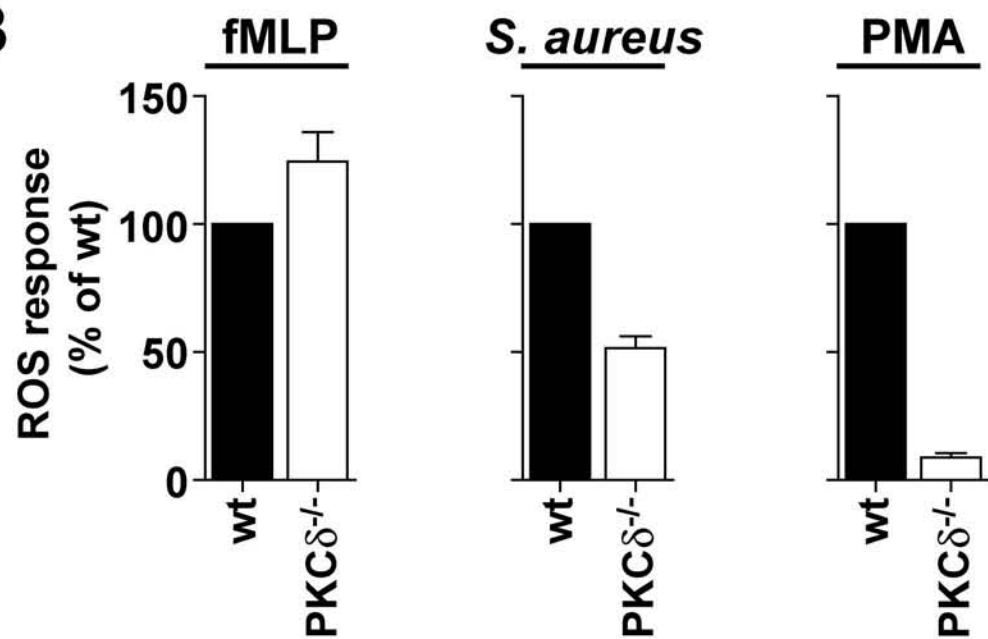

# Figure S6

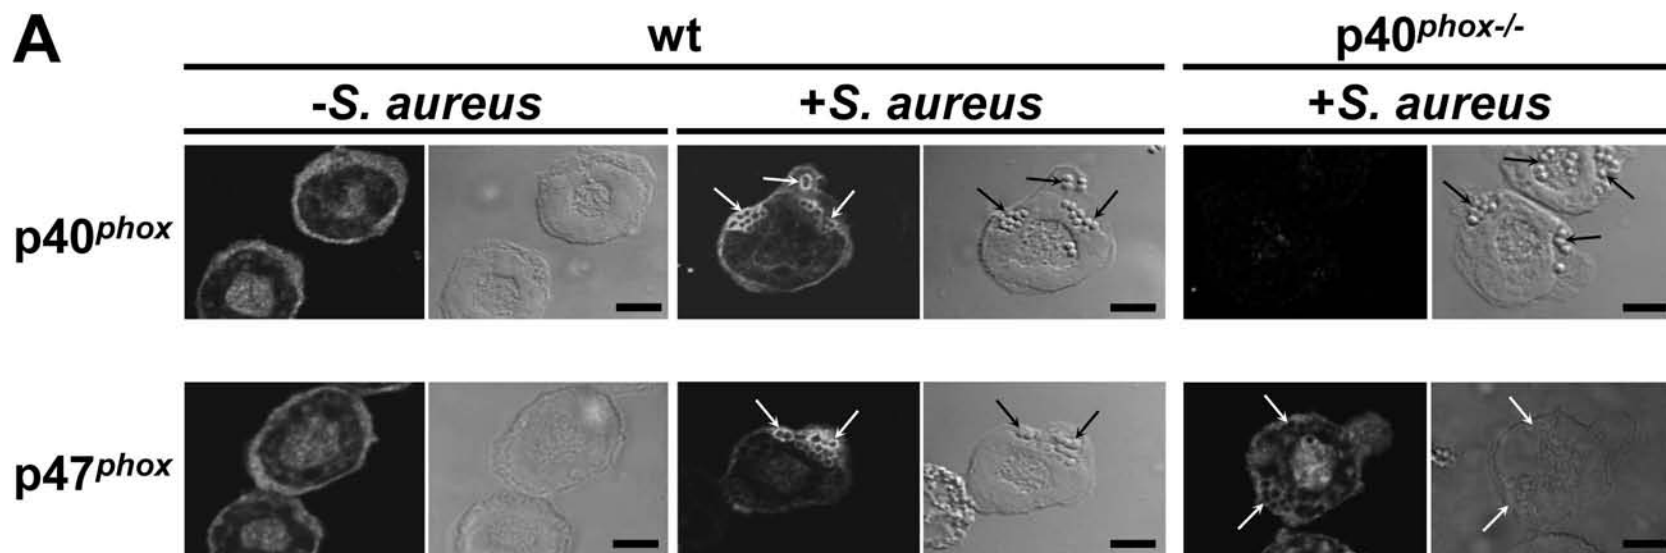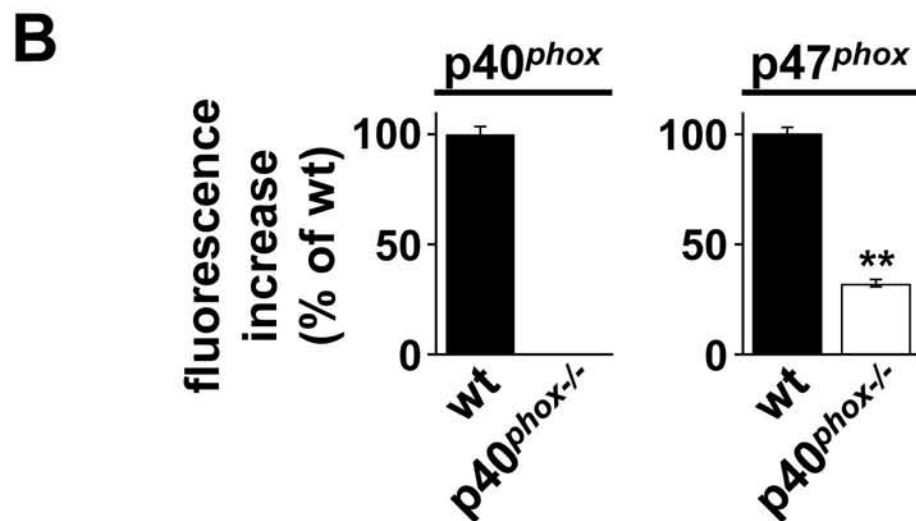

Supplement: supp_blood-2010-08-300889_Document1.pdf [file supp_blood-2010-08-300889_Document1.pdf]
